# Supplementary material for: Development of Stable Infectious cDNA Clones of Tomato Black Ring Virus Tagged with Green Fluorescent Protein
Source: MDPI journal article supplement (doi:10.3390/v16010125), 2024-01-15
Supplement: s1 [file s1]

**Supplementary Table S3**

Oligonucleotides used to obtain 2A self-cleaving peptide of the foot-and-mouth disease virus (FMDV).

| Name     | Sequence (5' -> 3')                                                                 |
|----------|-------------------------------------------------------------------------------------|
| 2AFMDV_F | AAGGAAGCGGAGTGAAACAGACTTTGAATTTGACCTTCT<br>CAAGTTGGCGGGAGACGTGGAGTCCAACCCTGGACCTAA  |
| 2AFMDV_R | AAAGGTCCAGGGTTGGACTCCACGTCTCCCGCCAACTTGA<br>GAAGGTCAAAATTCAAAGTCTGTTTCACTCCGCTTCCAA |
