# Supplementary material for: Development of Stable Infectious cDNA Clones of Tomato Black Ring Virus Tagged with Green Fluorescent Protein
Source: MDPI journal article supplement (doi:10.3390/v16010125), 2024-01-15
Supplement: s1 [file s1]

**Supplementary Table S1**

Primers used to obtain the GFP-tagged infectious TBRV clones.

| <b>GFP-TBRV Clone</b> | <b>Objective</b> | <b>Name</b>           | <b>Sequence (5'→3')</b>                                                       |
|-----------------------|------------------|-----------------------|-------------------------------------------------------------------------------|
| MP/5/GFP/5/CP         | vector           | G5 GFP vector F       | GCTGATGGAGACTTCGCCTGTGGTGAA<br>ACCATCACC                                      |
|                       |                  | G6 GFP vector R       | TTTAAAGTTGCAGCTTGATTCATCAAG<br>ACGGGGTTGATT                                   |
|                       | insert           | G7 GFP insert F       | GAATCAAGCTGCAACTTAAAAGCGGA<br>TGGAGACTTCATGGTGAGCAAGGGCG<br>AG                |
|                       |                  | G4 GFP insert R       | GTTTCACCACAGGCGAAGTCTCCATCA<br>GCTTTTAAGTTGCAGCTCTTGTACAGC<br>TCG             |
| MP/20/GFP/20/CP       | vector           | pJL_RNA2_casPW_F      | TAACCAGCCGCGACTGGACGAGAGCT<br>CCTGCAACCTCAAAGCAGACGGGGAT<br>TTTGCCT           |
|                       |                  | pJL_RNA2_casPW_R      | GCAATGTAATCGTCTCGCCGCACGCGA<br>AGTCGCCATCCGCCTTCAAATTACAAC<br>TTGATTCATCAAGAC |
|                       | insert           | sGFP_PW_F             | CGGCGAGACGATTACATTGCCGGCGA<br>CCTCCGCCTCCGGCATGGTGAGCAAG<br>GGCGAG            |
|                       |                  | sGFP_PW_R             | CGTCCAGTCGCGGCTGGTTAGAGGTGC<br>TCGCTCTGGCCAACTTGTACAGCTCGT<br>CCATGC          |
| HP/20/GFP/20/MP       | vector           | P1 HP-GFP-MP vector F | GACTGCGCTGTCTGTTTCCCAGGCTCC<br>GTATATAAGAGGCTGAATGGAGGAG                      |
|                       |                  | P1 HP-GFP-MP vector R | TCGGCACCAATCATCGTAACCTTTACC<br>GCCACCGTTGAGTCTTTTGTAGACCGA<br>ACCAGGAAAGC     |
|                       | insert           | P1 HP-GFP-MP insert F | GGTTACGATGATTGGTGCCGACTACCG<br>CCCAATAAAGAGATGGTGAGCAAGGG<br>CGAG             |
|                       |                  | P1 HP-GFP-MP insert R | TGGGAAACAGACAGCGCAGTCCTCCT<br>CGTCGAGTAGGATCTGAGCCTTGTACA<br>GCTCGTCCATG      |
| pJL89-P1-R2 + 2A      | vector           | 2A Vector.FOR         | ATTCTTAGGCATTTCTTATAGAGAATA<br>TCCCTCCC                                       |
|                       |                  | 2A Vector.REV         | TGCAGGAATAGTTAAAGGACCTGCAC<br>TTC                                             |
|                       | insert           | 2A Fragment F2        | TTAACTATTCTGCAGGAAGCGGAGTG<br>AAACAGACTT                                      |
|                       |                  | 2A Fragment R2        | GAAATGCCTAAGAATAGGTCCAGGGT<br>TGGACTCCACGTC                                   |

|           |        |                      |                                         |
|-----------|--------|----------------------|-----------------------------------------|
| CP/2A/GFP | vector | 2A Vector F          | ATTCTTAGGCATTTCTTATAGAGAATA<br>TCCCTCCC |
|           |        | 2AGFP<br>Vector R    | TGCAGGAATAGTTAAAGGACCTGCAC<br>TTC       |
|           | insert | 2AGFP<br>Fragment 2F | CCCTGGACCTATGGTGAGCAAG                  |
|           |        | 2AGFP<br>Fragment 2R | TATAAGAAATGCCTAAGAATCTTGTAC<br>AGCTCGT  |
