# Supplementary material for: Development of Stable Infectious cDNA Clones of Tomato Black Ring Virus Tagged with Green Fluorescent Protein
Source: MDPI journal article supplement (doi:10.3390/v16010125), 2024-01-15
Supplement: s1 [file s1]

**Supplementary Table S2**

Primers used to perform colony PCR and detection GFP insertion as well as TBRV-pJL89-P1-R1.

| <b>GFP-TBRV clone</b>           | <b>Name</b> | <b>Sequence (5'-&gt;3')</b> |
|---------------------------------|-------------|-----------------------------|
| MP/5/GFP/5CP<br>MP/20/GFP/20/CP | seqMPCPF    | CTGGCAACATTCCTGTTGGT        |
|                                 | seqMPCPR    | AACACGTGTGTTCGTATTCTTGA     |
| HP/20/GFP/20/MP                 | R2MJ2F      | CTGATGAAGACCTATGTGATGT      |
|                                 | R2MJ2R      | CATCCCGCTTCAGCAAGTTTA       |
| pJL89-P1-R2 + 2A<br>CP/2A/GFP   | 3RACER2PR1  | TGACTGTTAGCATAGAGGTTCA      |
|                                 | pJL89seqR   | GGGAAATTCGAGCTCTCCCT        |
| TBRV-pJL89-P1-R1                | R1KRTBRVF   | GGTAAAAGTTCTGGGTGCT         |
|                                 | R1KRTBRVR   | GCAAATCCACCTCCTTATCC        |
